# Supplementary material
Source: Springer Nature journal article supplement (https://www.springermedizin.de/resource/supplementary/13054_2011_624_MOESM1_ESM.pdf/9708876)
Supplement: MOESM1 [file 9708876]

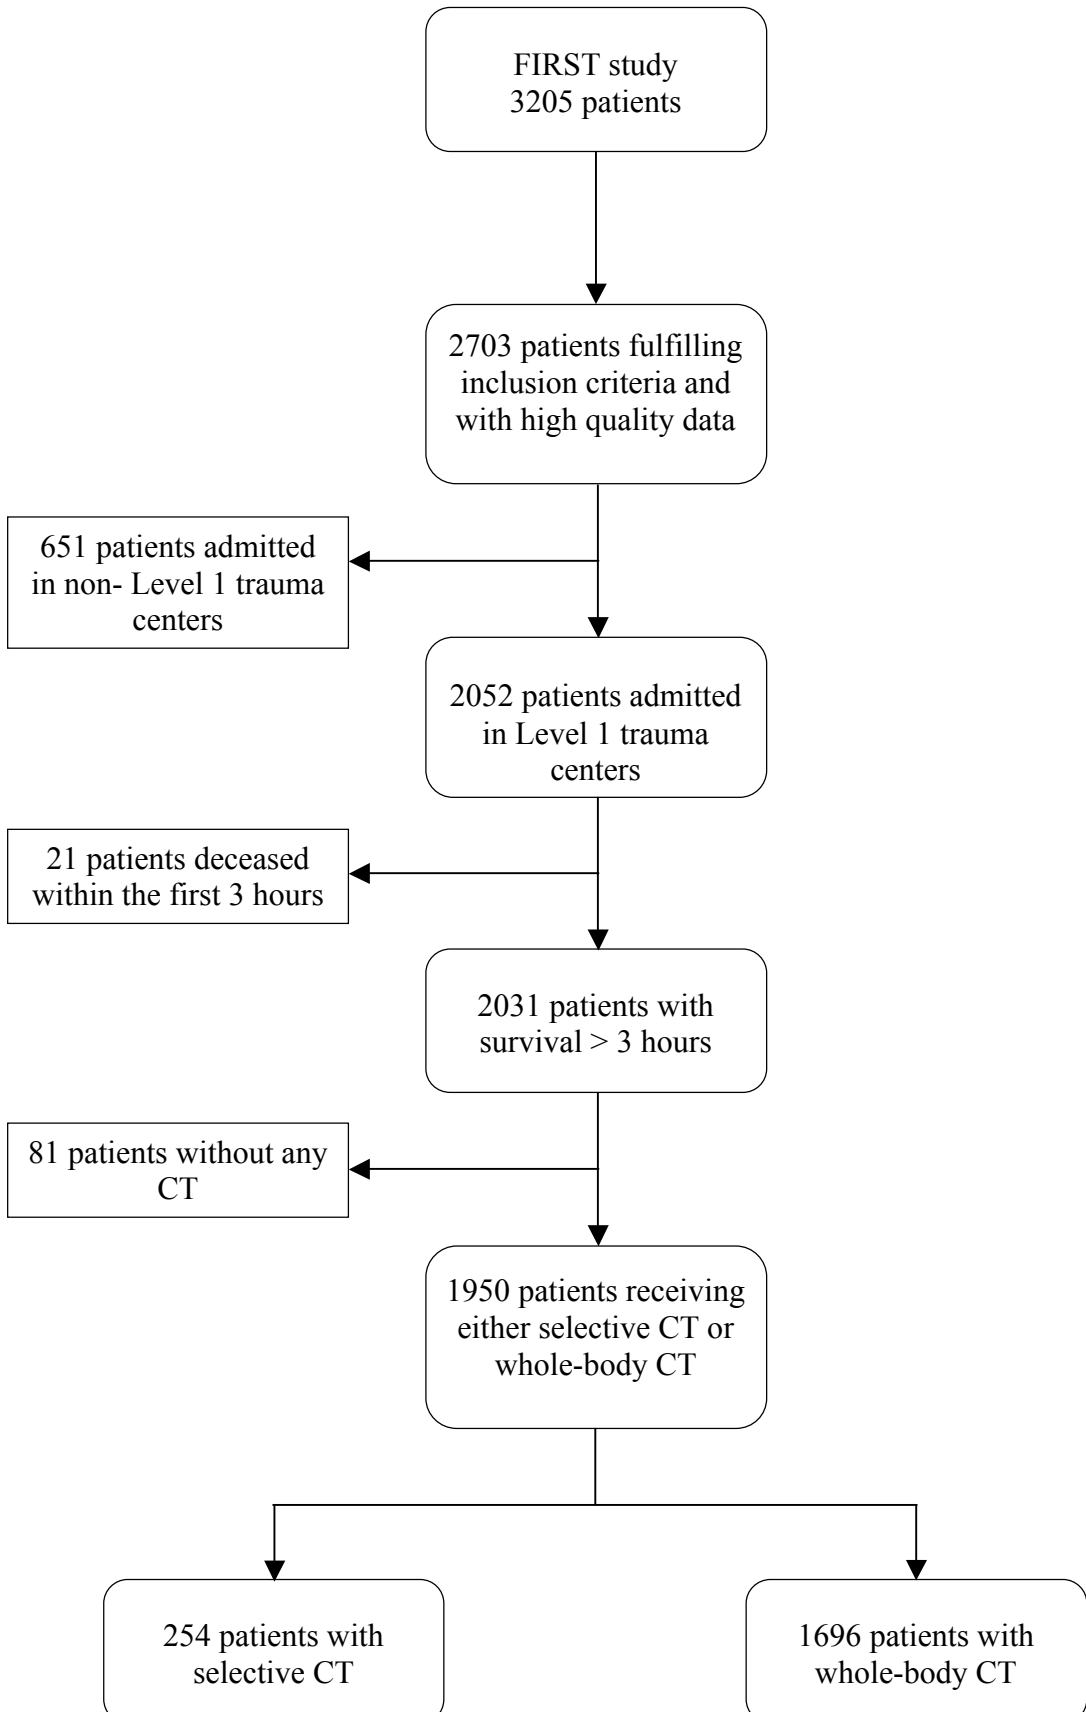

FIRST study  
3205 patients

2703 patients fulfilling  
inclusion criteria and  
with high quality data

651 patients admitted  
in non- Level 1 trauma  
centers

2052 patients admitted  
in Level 1 trauma  
centers

21 patients deceased  
within the first 3 hours

2031 patients with  
survival > 3 hours

81 patients without any  
CT

1950 patients receiving  
either selective CT or  
whole-body CT

254 patients with  
selective CT

1696 patients with  
whole-body CT
